# Supplementary material for: Crystallizing Vanadium Pentoxide Nanostructures in the Solid‐State Using Modified Block Copolymer and Chitosan Complexes
Source: Hindawi journal article supplement (doi:10.1155/2015/105157), 2015-01-01

Supporting Information for

**Crystallizing Vanadium Pentoxide Nanostructures in the Solid State using Modified  
Block co-Polymer and Chitosan Complexes**

C. Diaz<sup>1</sup>, G. Barrera<sup>1</sup>, M. Segovia<sup>1</sup>, M.L. Valenzuela<sup>2</sup>, M. Osiak<sup>3</sup>, and C. O'Dwyer<sup>3,4</sup>

<sup>1</sup> *Departamento de Química, Facultad de Química, Universidad de Chile. La Palmeras  
3425, Nuñoa, casilla 653, Santiago de Chile, Chile*

<sup>2</sup> *Universidad Autónoma de Chile, Inorganic Chemistry and Molecular Materials Group. El  
Llano Subercaseaux 2810, 5° piso, San Miguel, Santiago, Chile*

<sup>3</sup> *Department of Chemistry, University College Cork, Cork, Ireland*

<sup>4</sup> *Micro & Nanoelectronics Centre, Tyndall National Institute, Lee Maltings, Cork, Ireland*

Fig. S<sub>1</sub>

Photographs showing the color/aspect of the macromolecular precursors Chitosan•(VCl<sub>3</sub>)<sub>y</sub> and PS-b-4-VP•(VCl<sub>3</sub>)<sub>y</sub> in ratio 1:1

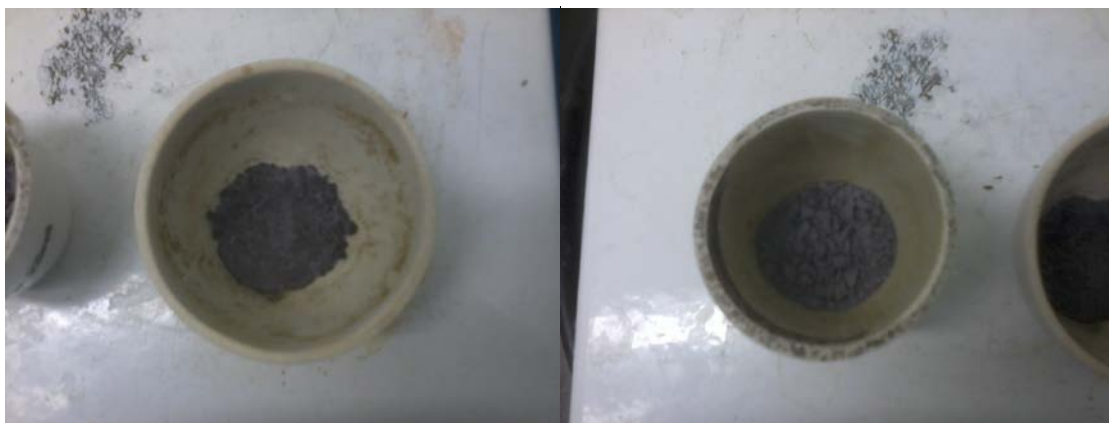

Photograph showing the color/aspect of the pyrolytic products PS-b-4-PVP•(VCl<sub>3</sub>)<sub>y</sub> and Chitosan •(VCl<sub>3</sub>)<sub>y</sub> in ratio 1:5

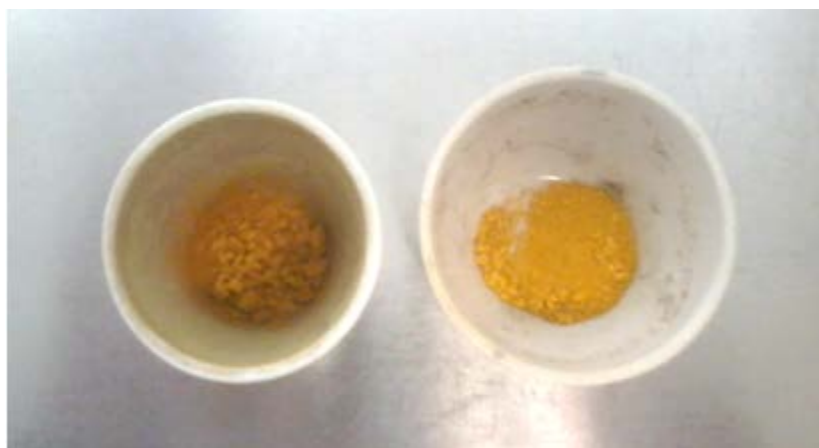

Fig. S<sub>2</sub> TG and DSC analysis of the precursor PS-b-4-PVP•(VCl<sub>3</sub>)<sub>y</sub> and chitosan•(VCl<sub>3</sub>)<sub>y</sub>

**PS-b-4-PVP•(VCl<sub>3</sub>)<sub>y</sub>**

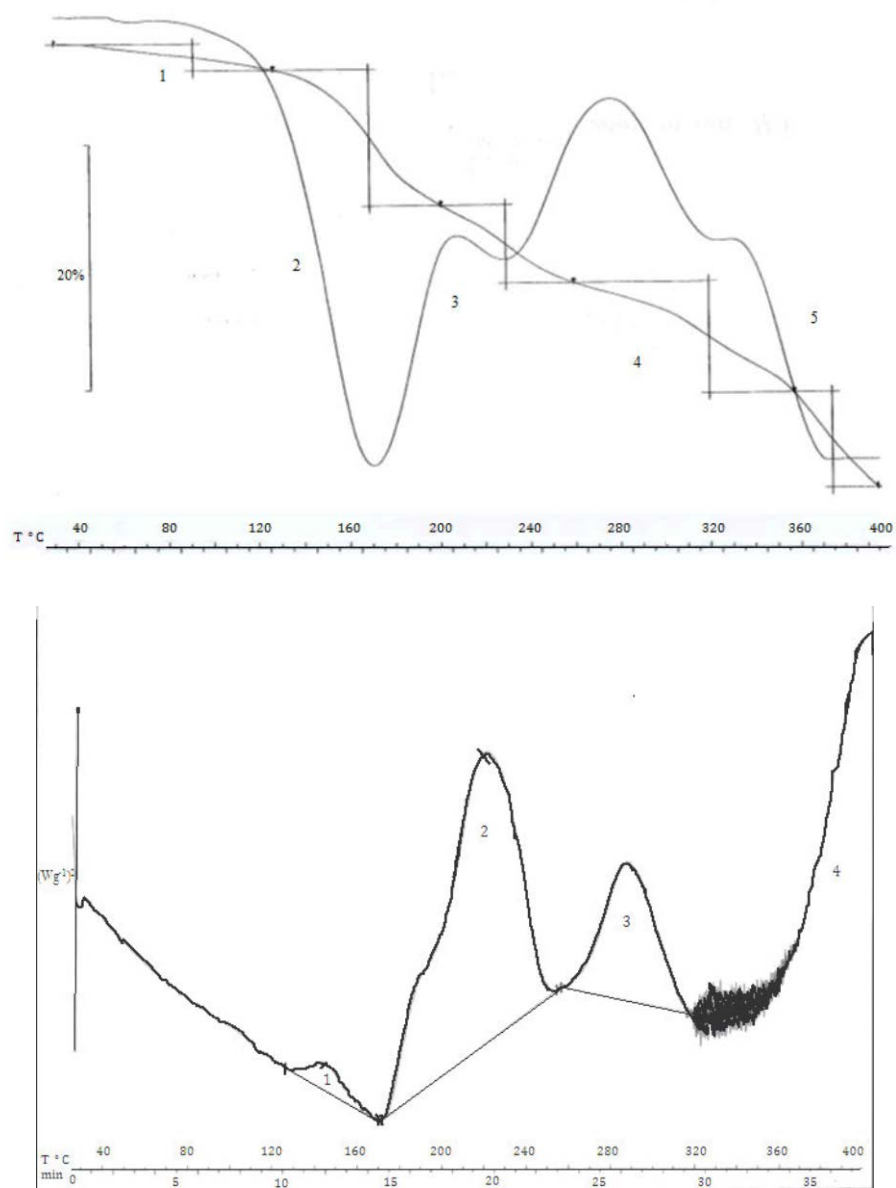

# Chitosan•(VCl<sub>3</sub>)<sub>y</sub>

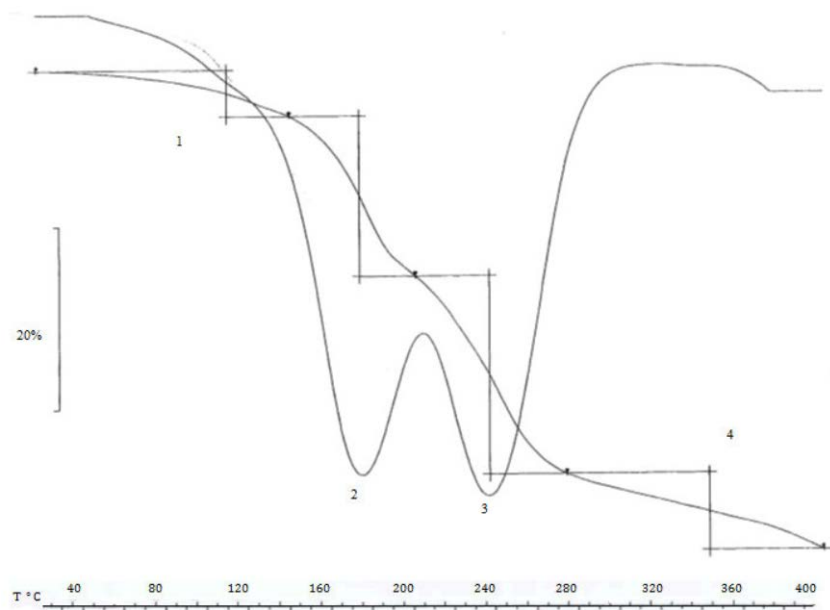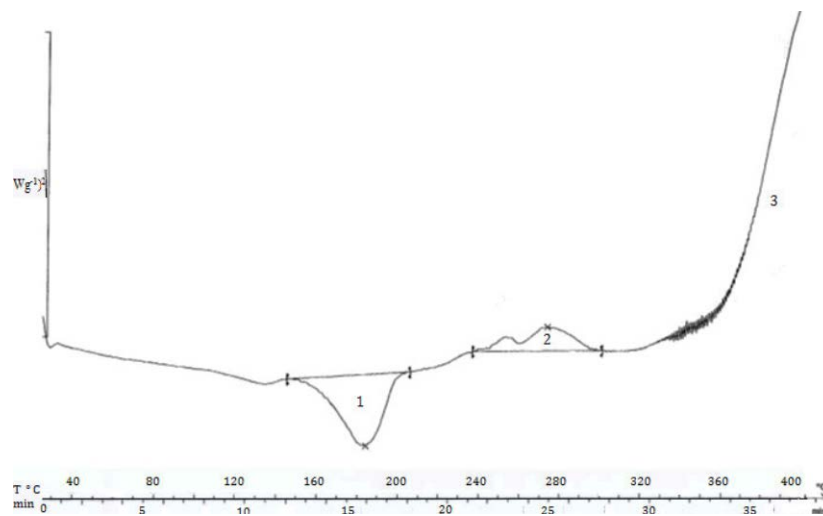

Fig. S<sub>3</sub>

XRD pattern of pyrolytic product from: PS-*co*-4-PVP-VCl<sub>3</sub> and chitosan-VCl<sub>3</sub> 1-1 precursors.

**PS-*b*-4-PVP•(VCl<sub>3</sub>)<sub>y</sub>**

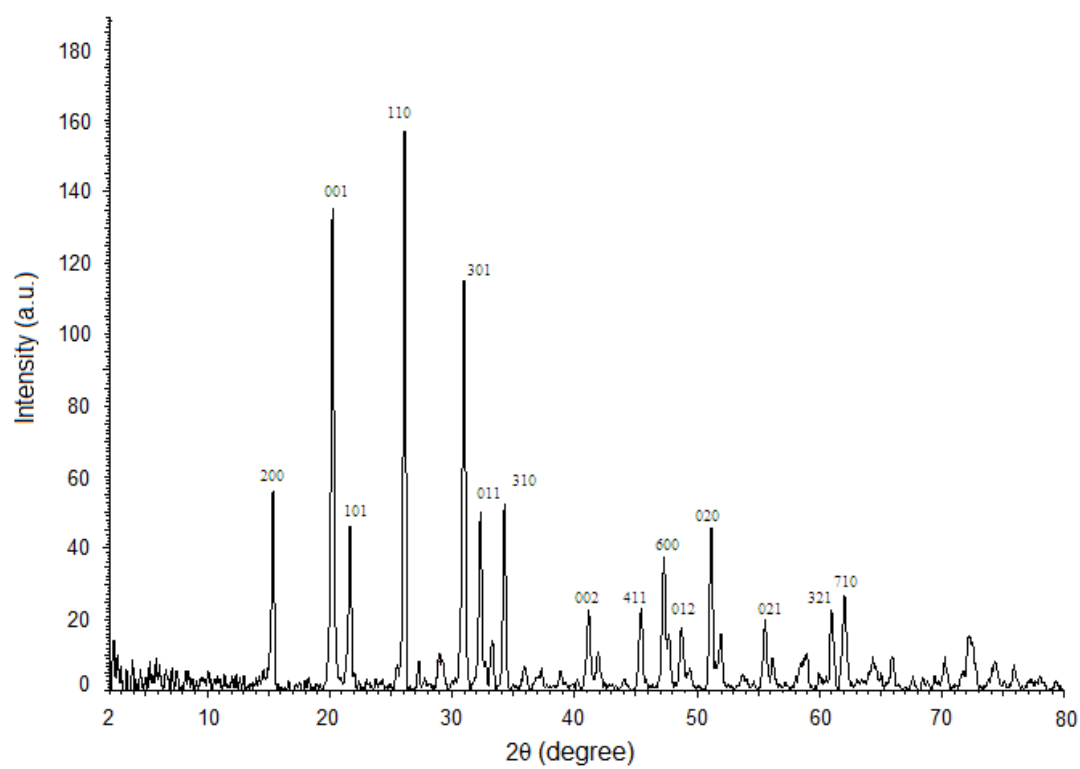

# Chitosan•(VCl<sub>3</sub>)<sub>y</sub>

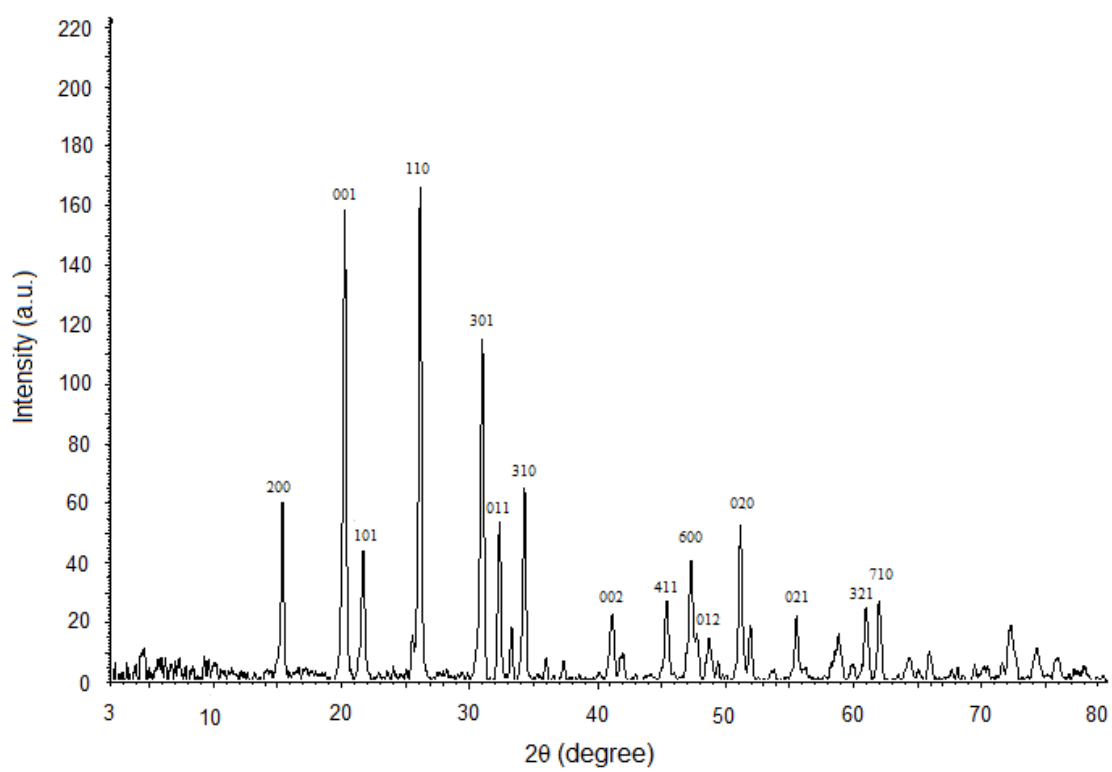

Fig S4 Photoluminescence of the pyrolytic product from the macromolecular precursors PS-co-4-PVP-VCl<sub>3</sub> and chitosan-VCl<sub>3</sub> 1:1 showing the emission at 731 nm when exciting at 364 and 362 nm.

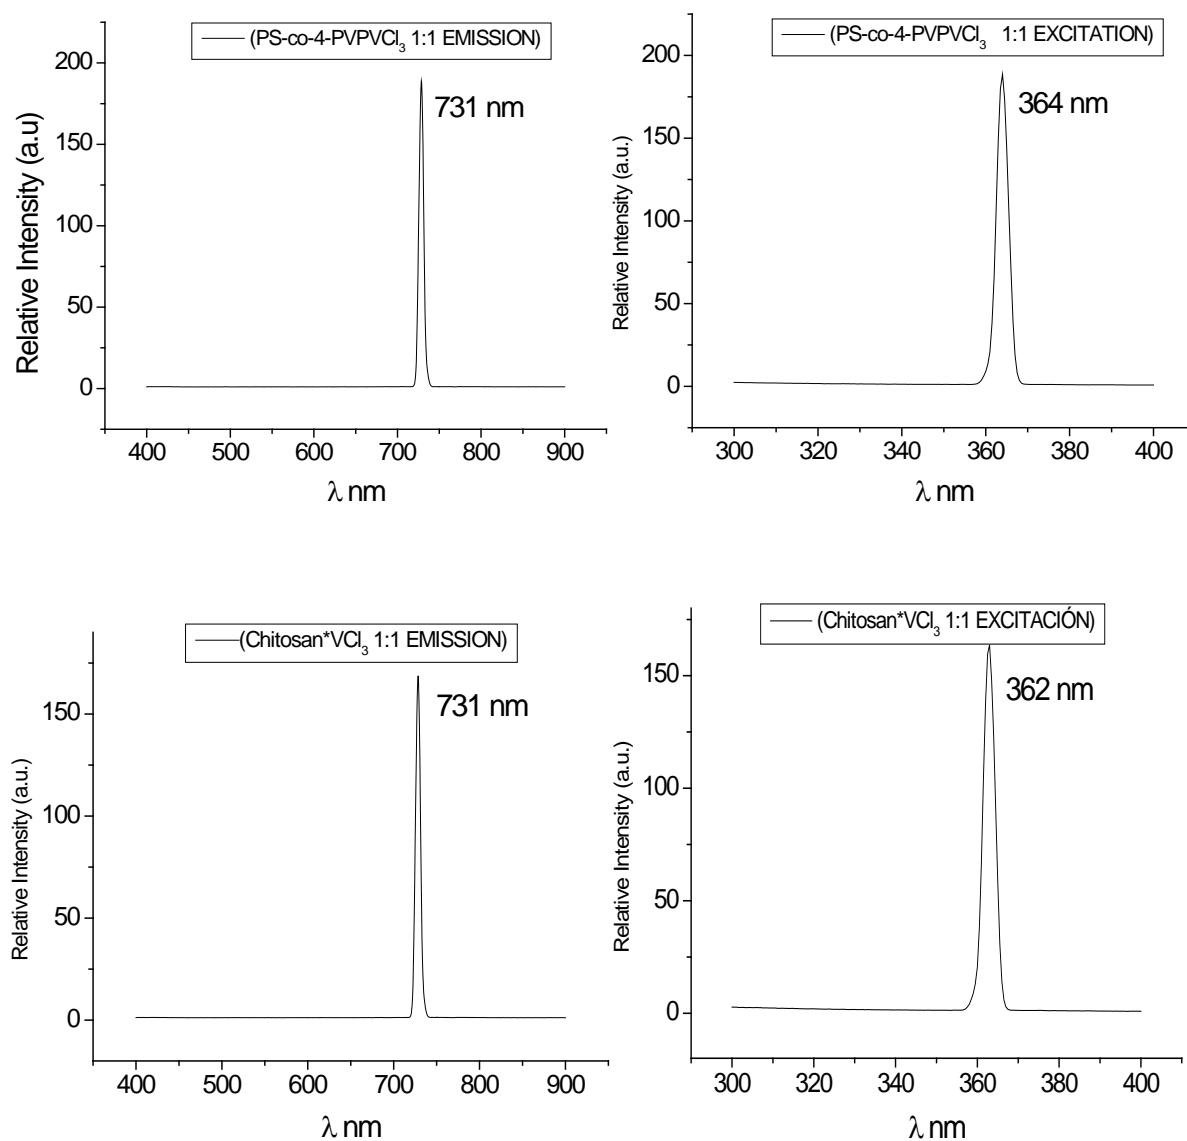

Supplement: f1 [file 105157.f1.pdf]
